# Supplementary material for: Identification of Proteins Involved in Cell Membrane Permeabilization by Nanosecond Electric Pulses (nsEP)
Source: MDPI journal article supplement (doi:10.3390/ijms24119191), 2023-05-24
Supplement: s1 [file s1]

**Table S1.** Effect of different gene knock-outs on YO-PRO-1 dye uptake by electroporated cells. The data for tested genes are presented in the alphabetical order. The average values of the mean or median YP fluorescence per cell are express in % to the parallel control (data not shown). The differences from the parallel control are expressed by t-values; the value over 3.0 corresponds to  $p < 0.05$  using Dunnet's test for the comparison of multiple groups with control. See text for more details.

| gene name | MEDIAN     |         |         |       | MEAN       |         |         |       |
|-----------|------------|---------|---------|-------|------------|---------|---------|-------|
|           | Average, % | s.e., % | t-value | SSMD  | Average, % | s.e., % | t-value | SSMD  |
| ANO6      | 104.8      | 1.8     | 1.87    | 0.66  | 101.1      | 7.05    | 0.09    | 0.03  |
| ASIC1     | 112.9      | 7.75    | 1.64    | 0.8   | 167.2      | 43.05   | 1.55    | 0.77  |
| ASIC2     | 102.1      | 12.98   | 0.16    | 0.09  | 92.5       | 10.89   | -0.55   | -0.22 |
| ASIC3     | 114        | 3.17    | 3.75    | 1.6   | 116.6      | 9.24    | 1.64    | 0.77  |
| ASIC4     | 99.3       | 9.75    | -0.07   | -0.03 | 97         | 8.22    | -0.26   | -0.09 |
| ASIC5     | 107.7      | 7.24    | 1.05    | 0.51  | 136.5      | 37.9    | 0.96    | 0.47  |
| ATP12A    | 107.9      | 2.28    | 2.62    | 1     | 123.8      | 18.22   | 1.27    | 0.68  |
| ATP13A1   | 103.5      | 6.3     | 0.5     | 0.23  | 96.2       | 7.52    | -0.34   | -0.12 |
| ATP13A2   | 107.6      | 5.45    | 1.31    | 0.65  | 133.4      | 21.06   | 1.56    | 0.85  |
| ATP13A4   | 95.8       | 4.74    | -0.85   | -0.39 | 103        | 1.37    | 0.72    | 0.22  |
| ATP13A5   | 102.8      | 2.13    | 1.13    | 0.46  | 119.4      | 9.15    | 1.86    | 0.77  |
| ATP1A1    | 102.3      | 6.59    | 0.34    | 0.18  | 103.4      | 8.41    | 0.36    | 0.17  |
| ATP1A2    | 105.8      | 8.06    | 0.71    | 0.35  | 116.5      | 16.17   | 0.98    | 0.45  |
| ATP1A3    | 78         | 8.48    | -2.57   | -1.26 | 78.3       | 10.85   | -1.82   | -0.79 |
| ATP1A4    | 92.9       | 4.57    | -1.48   | -0.67 | 104.5      | 10.63   | 0.39    | 0.18  |
| ATP2A1    | 105.7      | 7.62    | 0.74    | 0.37  | 101.6      | 3.91    | 0.23    | 0.07  |
| ATP2A2    | 101.5      | 0.97    | 0.68    | 0.21  | 105.3      | 5.24    | 0.8     | 0.33  |
| ATP2A3    | 102.8      | 14.57   | 0.19    | 0.1   | 88.9       | 6.16    | -1.09   | -0.37 |
| ATP2B1    | 91.4       | 1.66    | -4.58   | -1.92 | 85.3       | 1.02    | -2.12   | -0.62 |
| ATP2B2    | 98.5       | 4.14    | -0.36   | -0.17 | 101        | 7.69    | 0.1     | 0.04  |
| ATP2C1    | 105.7      | 6.09    | 0.93    | 0.45  | 93.1       | 5.85    | -0.83   | -0.29 |
| ATP2C2    | 109.9      | 2.05    | 3.93    | 1.2   | 134.1      | 3.6     | 5.9     | 1.64  |
| ATP4A     | 115.5      | 4.8     | 3.09    | 1.05  | 132        | 8.65    | 3.28    | 1.05  |
| ATP5B     | 92.1       | 5.17    | -1.5    | -0.82 | 89.1       | 13.57   | -0.73   | -0.35 |
| ATP6V1A   | 96.6       | 1.38    | -2.11   | -0.85 | 103.2      | 5       | 0.38    | 0.13  |
| ATP6V1B2  | 106        | 2.71    | 1.79    | 0.73  | 125.6      | 1.65    | 5.74    | 1.75  |
| ATP7A     | 95.7       | 2.02    | -1.96   | -0.86 | 104.5      | 13.17   | 0.3     | 0.13  |
| ATP7B     | 110.8      | 6.29    | 1.64    | 0.84  | 131.9      | 17.24   | 1.8     | 0.96  |
| BEST1     | 109.5      | 0.9     | 4.42    | 1.38  | 112.9      | 9.83    | 1.21    | 0.64  |
| BEST2     | 103.3      | 4.5     | 0.72    | 0.34  | 90.2       | 4.12    | -1.35   | -0.44 |
| BEST3     | 104.1      | 14.89   | 0.27    | 0.15  | 133.6      | 17.56   | 1.74    | 0.81  |

|          |  |       |       |       |       |  |       |       |       |       |
|----------|--|-------|-------|-------|-------|--|-------|-------|-------|-------|
| BEST4    |  | 105.2 | 3.45  | 1.31  | 0.53  |  | 113.5 | 17.41 | 0.72  | 0.32  |
| CACHD1   |  | 103.7 | 3.58  | 0.98  | 0.44  |  | 118.6 | 6.07  | 2.38  | 0.89  |
| CACNA1A  |  | 112.4 | 3.79  | 2.9   | 1.31  |  | 136.5 | 6.32  | 4.83  | 2.02  |
| CACNA1B  |  | 101.4 | 3.93  | 0.33  | 0.15  |  | 96.4  | 19.52 | -0.18 | -0.1  |
| CACNA1C  |  | 106.9 | 5.17  | 1.23  | 0.55  |  | 112.5 | 16.11 | 0.72  | 0.32  |
| CACNA1D  |  | 102.8 | 1     | 1.21  | 0.38  |  | 110.1 | 6.14  | 1.12  | 0.39  |
| CACNA1E  |  | 99.8  | 2.43  | -0.09 | -0.04 |  | 112.5 | 17.22 | 0.68  | 0.3   |
| CACNA1G  |  | 113.8 | 3.46  | 3.67  | 1.21  |  | 137.1 | 8.13  | 3.99  | 1.27  |
| CACNA1H  |  | 105.6 | 11.61 | 0.46  | 0.25  |  | 103.2 | 16.73 | 0.17  | 0.08  |
| CACNA1I  |  | 102.9 | 5.24  | 0.52  | 0.23  |  | 102.2 | 9.66  | 0.19  | 0.07  |
| CACNA1S  |  | 100.6 | 2.63  | 0.19  | 0.07  |  | 119.6 | 8.64  | 1.8   | 0.68  |
| CACNA2D4 |  | 101.6 | 8.82  | 0.18  | 0.09  |  | 87.2  | 4.86  | -1.66 | -0.56 |
| CACNB1   |  | 115.8 | 3.32  | 4.09  | 1.77  |  | 132.8 | 18.9  | 1.7   | 0.92  |
| CACNB2   |  | 85.4  | 14.84 | -0.98 | -0.49 |  | 69.2  | 9.88  | -2.67 | -1.08 |
| CACNB3   |  | 103.5 | 6.63  | 0.52  | 0.25  |  | 96.7  | 6.72  | -0.37 | -0.14 |
| CACNB4   |  | 106   | 4.7   | 1.18  | 0.57  |  | 111.4 | 14.96 | 0.73  | 0.39  |
| CACNG2   |  | 94.3  | 2.76  | -1.97 | -0.91 |  | 83.1  | 13.52 | -1.12 | -0.47 |
| CACNG3   |  | 97.7  | 4.65  | -0.49 | -0.23 |  | 88.8  | 7.52  | -1.17 | -0.44 |
| CACNG4   |  | 112.8 | 1.66  | 5     | 1.74  |  | 120.1 | 5.55  | 2.89  | 1.16  |
| CACNG5   |  | 109.7 | 3.73  | 2.3   | 1.04  |  | 118.6 | 1.87  | 4.1   | 1.27  |
| CACNG7   |  | 104.5 | 1.94  | 1.64  | 0.6   |  | 131.2 | 23.04 | 1.33  | 0.74  |
| CATSPER2 |  | 102.6 | 2.15  | 1.04  | 0.43  |  | 107.1 | 12.88 | 0.51  | 0.23  |
| CATSPER3 |  | 103.7 | 3.28  | 1.01  | 0.47  |  | 99.8  | 4.62  | -0.03 | -0.01 |
| CHRNA1   |  | 98.8  | 3.12  | -0.36 | -0.15 |  | 110   | 8.48  | 1.07  | 0.46  |
| CHRNA10  |  | 105.3 | 2.55  | 1.78  | 0.59  |  | 126.4 | 8.26  | 2.81  | 0.93  |
| CHRNA2   |  | 107.6 | 4.6   | 1.53  | 0.73  |  | 124.3 | 17.77 | 1.33  | 0.72  |
| CHRNA3   |  | 103.9 | 10.65 | 0.35  | 0.18  |  | 107.5 | 7.37  | 0.68  | 0.24  |
| CHRNA4   |  | 93.5  | 3.68  | -1.71 | -0.8  |  | 81.8  | 5.25  | -2.3  | -0.79 |
| CHRNA5   |  | 95.8  | 5.59  | -0.72 | -0.34 |  | 95.3  | 9.3   | -0.46 | -0.2  |
| CHRNA6   |  | 110.3 | 5.14  | 1.86  | 0.83  |  | 126.3 | 10.49 | 2.12  | 0.85  |
| CHRNA7   |  | 111.3 | 4     | 2.54  | 1.17  |  | 115.5 | 14.58 | 1.02  | 0.53  |
| CHRNA9   |  | 110.4 | 1.14  | 4.61  | 1.48  |  | 111.7 | 7.77  | 1.33  | 0.6   |
| CHRNA10  |  | 110.3 | 2.3   | 3.4   | 1.3   |  | 124.2 | 20.22 | 1.17  | 0.64  |
| CHRNA11  |  | 110.3 | 2.3   | 3.4   | 1.3   |  | 124.2 | 20.22 | 1.17  | 0.64  |
| CHRNA12  |  | 110.3 | 2.3   | 3.4   | 1.3   |  | 124.2 | 20.22 | 1.17  | 0.64  |
| CHRNA13  |  | 110.3 | 2.3   | 3.4   | 1.3   |  | 124.2 | 20.22 | 1.17  | 0.64  |
| CHRNA14  |  | 110.3 | 2.3   | 3.4   | 1.3   |  | 124.2 | 20.22 | 1.17  | 0.64  |
| CHRNA15  |  | 110.3 | 2.3   | 3.4   | 1.3   |  | 124.2 | 20.22 | 1.17  | 0.64  |
| CHRNA16  |  | 110.3 | 2.3   | 3.4   | 1.3   |  | 124.2 | 20.22 | 1.17  | 0.64  |
| CHRNA17  |  | 110.3 | 2.3   | 3.4   | 1.3   |  | 124.2 | 20.22 | 1.17  | 0.64  |
| CHRNA18  |  | 110.3 | 2.3   | 3.4   | 1.3   |  | 124.2 | 20.22 | 1.17  | 0.64  |
| CHRNA19  |  | 110.3 | 2.3   | 3.4   | 1.3   |  | 124.2 | 20.22 | 1.17  | 0.64  |
| CHRNA20  |  | 110.3 | 2.3   | 3.4   | 1.3   |  | 124.2 | 20.22 | 1.17  | 0.64  |
| CHRNA21  |  | 110.3 | 2.3   | 3.4   | 1.3   |  | 124.2 | 20.22 | 1.17  | 0.64  |
| CHRNA22  |  | 110.3 | 2.3   | 3.4   | 1.3   |  | 124.2 | 20.22 | 1.17  | 0.64  |
| CHRNA23  |  | 110.3 | 2.3   | 3.4   | 1.3   |  | 124.2 | 20.22 | 1.17  | 0.64  |
| CHRNA24  |  | 110.3 | 2.3   | 3.4   | 1.3   |  | 124.2 | 20.22 | 1.17  | 0.64  |
| CHRNA25  |  | 110.3 | 2.3   | 3.4   | 1.3   |  | 124.2 | 20.22 | 1.17  | 0.64  |
| CHRNA26  |  | 110.3 | 2.3   | 3.4   | 1.3   |  | 124.2 | 20.22 | 1.17  | 0.64  |
| CHRNA27  |  | 110.3 | 2.3   | 3.4   | 1.3   |  | 124.2 | 20.22 | 1.17  | 0.64  |
| CHRNA28  |  | 110.3 | 2.3   | 3.4   | 1.3   |  | 124.2 | 20.22 | 1.17  | 0.64  |
| CHRNA29  |  | 110.3 | 2.3   | 3.4   | 1.3   |  | 124.2 | 20.22 | 1.17  | 0.64  |
| CHRNA30  |  | 110.3 | 2.3   | 3.4   | 1.3   |  | 124.2 | 20.22 | 1.17  | 0.64  |
| CHRNA31  |  | 110.3 | 2.3   | 3.4   | 1.3   |  | 124.2 | 20.22 | 1.17  | 0.64  |
| CHRNA32  |  | 110.3 | 2.3   | 3.4   | 1.3   |  | 124.2 | 20.22 | 1.17  | 0.64  |
| CHRNA33  |  | 110.3 | 2.3   | 3.4   | 1.3   |  | 124.2 | 20.22 | 1.17  | 0.64  |
| CHRNA34  |  | 110.3 | 2.3   | 3.4   | 1.3   |  | 124.2 | 20.22 | 1.17  | 0.64  |
| CHRNA35  |  | 110.3 | 2.3   | 3.4   | 1.3   |  | 124.2 | 20.22 | 1.17  | 0.64  |
| CHRNA36  |  | 110.3 | 2.3   | 3.4   | 1.3   |  | 124.2 | 20.22 | 1.17  | 0.64  |
| CHRNA37  |  | 110.3 | 2.3   | 3.4   | 1.3   |  | 124.2 | 20.22 | 1.17  | 0.64  |
| CHRNA38  |  | 110.3 | 2.3   | 3.4   | 1.3   |  | 124.2 | 20.22 | 1.17  | 0.64  |
| CHRNA39  |  | 110.3 | 2.3   | 3.4   | 1.3   |  | 124.2 | 20.22 | 1.17  | 0.64  |
| CHRNA40  |  | 110.3 | 2.3   | 3.4   | 1.3   |  | 124.2 | 20.22 | 1.17  | 0.64  |
| CHRNA41  |  | 110.3 | 2.3   | 3.4   | 1.3   |  | 124.2 | 20.22 | 1.17  | 0.64  |
| CHRNA42  |  | 110.3 | 2.3   | 3.4   | 1.3   |  | 124.2 | 20.22 | 1.17  | 0.64  |
| CHRNA43  |  | 110.3 | 2.3   | 3.4   | 1.3   |  | 124.2 | 20.22 | 1.17  | 0.64  |
| CHRNA44  |  | 110.3 | 2.3   | 3.4   | 1.3   |  | 124.2 | 20.22 | 1.17  | 0.64  |
| CHRNA45  |  | 110.3 | 2.3   | 3.4   | 1.3   |  | 124.2 | 20.22 | 1.17  | 0.64  |
| CHRNA46  |  | 110.3 | 2.3   | 3.4   | 1.3   |  | 124.2 | 20.22 | 1.17  | 0.64  |
| CHRNA47  |  | 110.3 | 2.3   | 3.4   | 1.3   |  | 124.2 | 20.22 | 1.17  | 0.64  |
| CHRNA48  |  | 110.3 | 2.3   | 3.4   | 1.3   |  | 124.2 | 20.22 | 1.17  | 0.64  |
| CHRNA49  |  | 110.3 | 2.3   | 3.4   | 1.3   |  | 124.2 | 20.22 | 1.17  | 0.64  |
| CHRNA50  |  | 110.3 | 2.3   | 3.4   | 1.3   |  | 124.2 | 20.22 | 1.17  | 0.64  |
| CHRNA51  |  | 110.3 | 2.3   | 3.4   | 1.3   |  | 124.2 | 20.22 | 1.17  | 0.64  |
| CHRNA52  |  | 110.3 | 2.3   | 3.4   | 1.3   |  | 124.2 | 20.22 | 1.17  | 0.64  |
| CHRNA53  |  | 110.3 | 2.3   | 3.4   | 1.3   |  | 124.2 | 20.22 | 1.17  | 0.64  |
| CHRNA54  |  | 110.3 | 2.3   | 3.4   | 1.3   |  | 124.2 | 20.22 | 1.17  | 0.64  |
| CHRNA55  |  | 110.3 | 2.3   | 3.4   | 1.3   |  | 124.2 | 20.22 | 1.17  | 0.64  |
| CHRNA56  |  | 110.3 | 2.3   | 3.4   | 1.3   |  | 124.2 | 20.22 | 1.17  | 0.64  |
| CHRNA57  |  | 110.3 | 2.3   | 3.4   | 1.3   |  | 124.2 | 20.22 | 1.17  | 0.64  |
| CHRNA58  |  | 110.3 | 2.3   | 3.4   | 1.3   |  | 124.2 | 20.22 | 1.17  | 0.64  |
| CHRNA59  |  | 110.3 | 2.3   | 3.4   | 1.3   |  | 124.2 | 20.22 | 1.17  | 0.64  |
| CHRNA60  |  | 110.3 | 2.3   | 3.4   | 1.3   |  | 124.2 | 20.22 | 1.17  | 0.64  |
| CHRNA61  |  | 110.3 | 2.3   | 3.4   | 1.3   |  | 124.2 | 20.22 | 1.17  | 0.64  |
| CHRNA62  |  | 110.3 | 2.3   | 3.4   | 1.3   |  | 124.2 | 20.22 | 1.17  | 0.64  |
| CHRNA63  |  | 110.3 | 2.3   | 3.4   | 1.3   |  | 124.2 | 20.22 | 1.17  | 0.64  |
| CHRNA64  |  | 110.3 | 2.3   | 3.4   | 1.3   |  | 124.2 | 20.22 | 1.17  | 0.64  |
| CHRNA65  |  | 110.3 | 2.3   | 3.4   | 1.3   |  | 124.2 | 20.22 | 1.17  | 0.64  |
| CHRNA66  |  | 110.3 | 2.3   | 3.4   | 1.3   |  | 124.2 | 20.22 | 1.17  | 0.64  |
| CHRNA67  |  | 110.3 | 2.3   | 3.4   | 1.3   |  | 124.2 | 20.22 | 1.17  | 0.64  |
| CHRNA68  |  | 110.3 | 2.3   | 3.4   | 1.3   |  | 124.2 | 20.22 | 1.17  | 0.64  |
| CHRNA69  |  | 110.3 | 2.3   | 3.4   | 1.3   |  | 124.2 | 20.22 | 1.17  | 0.64  |
| CHRNA70  |  | 110.3 | 2.3   | 3.4   | 1.3   |  | 124.2 | 20.22 | 1.17  | 0.64  |
| CHRNA71  |  | 110.3 | 2.3   | 3.4   | 1.3   |  | 124.2 | 20.22 | 1.17  | 0.64  |
| CHRNA72  |  | 110.3 | 2.3   | 3.4   | 1.3   |  | 124.2 | 20.22 | 1.17  | 0.64  |
| CHRNA73  |  | 110.3 | 2.3   | 3.4   | 1.3   |  | 124.2 | 20.22 | 1.17  | 0.64  |
| CHRNA74  |  | 110.3 | 2.3   | 3.4   | 1.3   |  | 124.2 | 20.22 | 1.17  | 0.64  |
| CHRNA75  |  | 110.3 | 2.3   | 3.4   | 1.3   |  | 124.2 | 20.22 | 1.17  | 0.64  |
| CHRNA76  |  | 110.3 | 2.3   | 3.4   | 1.3   |  | 124.2 | 20.22 | 1.17  | 0.64  |
| CHRNA77  |  | 110.3 | 2.3   | 3.4   | 1.3   |  | 124.2 | 20.22 | 1.17  | 0.64  |
| CHRNA78  |  | 110.3 | 2.3   | 3.4   | 1.3   |  | 124.2 | 20.22 | 1.17  | 0.64  |
| CHRNA79  |  | 110.3 | 2.3   | 3.4   | 1.3   |  | 124.2 | 20.22 | 1.17  | 0.64  |
| CHRNA80  |  | 110.3 | 2.3   | 3.4   | 1.3   |  | 124.2 | 20.22 | 1.17  | 0.64  |
| CHRNA81  |  | 110.3 | 2.3   | 3.4   | 1.3   |  | 124.2 | 20.22 | 1.17  | 0.64  |
| CHRNA82  |  | 110.3 | 2.3   | 3.4   | 1.3   |  | 124.2 | 20.22 | 1.17  | 0.64  |
| CHRNA83  |  | 110.3 | 2.3   | 3.4   | 1.3   |  | 124.2 | 20.22 | 1.17  | 0.64  |
| CHRNA84  |  | 110.3 | 2.3   | 3.4   | 1.3   |  | 124.2 | 20.22 | 1.17  | 0.64  |
| CHRNA85  |  | 110.3 | 2.3   | 3.4   | 1.3   |  | 124.2 | 20.22 | 1.17  | 0.64  |
| CHRNA86  |  | 110.3 | 2.3   | 3.4   | 1.3   |  | 124.2 | 20.22 | 1.17  | 0.64  |
| CHRNA87  |  | 110.3 | 2.3   | 3.4   | 1.3   |  | 124.2 | 20.22 | 1.17  | 0.64  |
| CHRNA88  |  | 110.3 | 2.3   | 3.4   | 1.3   |  | 124.2 | 20.22 | 1.17  | 0.64  |
| CHRNA89  |  | 110.3 | 2.3   | 3.4   | 1.3   |  | 124.2 | 20.22 | 1.17  | 0.64  |
| CHRNA90  |  | 110.3 | 2.3   | 3.4   | 1.3   |  | 124.2 | 20.22 | 1.17  | 0.64  |
| CHRNA91  |  | 110.3 | 2.3   | 3.4   | 1.3   |  | 124.2 | 20.22 | 1.17  | 0.64  |
| CHRNA92  |  | 110.3 | 2.3   | 3.4   | 1.3   |  | 124.2 | 20.22 | 1.17  | 0.64  |
| CHRNA93  |  | 110.3 | 2.3   | 3.4   | 1.3   |  | 124.2 | 20.22 | 1.17  | 0.64  |
| CHRNA94  |  | 110.3 | 2.3   | 3.4   | 1.3   |  | 124.2 | 20.22 | 1.17  | 0.64  |
| CHRNA95  |  | 110.3 | 2.3   | 3.4   | 1.3   |  | 124.2 | 20.22 | 1.17  | 0.64  |
| CHRNA96  |  | 110.3 | 2.3   | 3.4   | 1.3   |  | 124.2 | 20.22 | 1.17  | 0.64  |
| CHRNA97  |  | 110.3 | 2.3   | 3.4   | 1.3   |  | 124.2 | 20.22 | 1.17  | 0.64  |
| CHRNA98  |  | 110.3 | 2.3   | 3.4   | 1.3   |  | 124.2 | 20.22 | 1.17  | 0.64  |
| CHRNA99  |  | 110.3 | 2.3   | 3.4   | 1.3   |  | 124.2 | 20.22 | 1.17  | 0.64  |
| CHRNA100 |  | 110.3 | 2.3   | 3.4   | 1.3   |  | 124.2 | 20.22 | 1.17  | 0.64  |
| CHRNA101 |  | 110.3 | 2.3   | 3.4   | 1.3   |  | 124.2 | 20.22 | 1.17  | 0.64  |
| CHRNA102 |  | 110.3 | 2.3   | 3.4   | 1.3   |  | 124.2 | 20.22 | 1.17  | 0.64  |
| CHRNA103 |  | 110.3 | 2.3   | 3.4   | 1.3   |  | 124.2 | 20.22 | 1.17  | 0.64  |
| CHRNA104 |  | 110.3 | 2.3   | 3.4   | 1.3   |  | 124.2 | 20.22 | 1.17  | 0.64  |
| CHRNA105 |  | 110.3 | 2.3   | 3.4   | 1.3   |  | 124.2 | 20.22 | 1.17  | 0.64  |
| CHRNA106 |  | 110.3 | 2.3   | 3.4   | 1.3   |  | 124.2 | 20.22 | 1.17  | 0.64  |
| CHRNA107 |  | 110.3 | 2.3   | 3.4   | 1.3   |  | 124.2 | 20.22 | 1.17  | 0.64  |
| CHRNA108 |  | 110.3 | 2.3   | 3.4   | 1.3   |  | 124.2 | 20.22 | 1.17  | 0.64  |
| CHRNA109 |  |       |       |       |       |  |       |       |       |       |

|        |  |       |       |       |       |  |       |       |       |       |
|--------|--|-------|-------|-------|-------|--|-------|-------|-------|-------|
| CLCN3  |  | 108.1 | 8.98  | 0.9   | 0.44  |  | 97.5  | 12.2  | -0.18 | -0.08 |
| CLCN4  |  | 107.5 | 5.03  | 1.42  | 0.48  |  | 127   | 18.9  | 1.39  | 0.48  |
| CLCN6  |  | 100.5 | 3.06  | 0.14  | 0.06  |  | 99.9  | 9.79  | -0.01 | 0     |
| CLCNKA |  | 100.7 | 5.16  | 0.13  | 0.06  |  | 79.9  | 11.42 | -1.56 | -0.66 |
| CLCNKB |  | 128   | 29.62 | 0.94  | 0.53  |  | 122.9 | 15.02 | 1.34  | 0.6   |
| CLIC1  |  | 100.1 | 4.02  | 0.02  | 0.01  |  | 86.4  | 8.64  | -1.29 | -0.5  |
| CLIC2  |  | 102   | 3.7   | 0.49  | 0.24  |  | 117.1 | 14.86 | 1.11  | 0.58  |
| CLIC3  |  | 102.9 | 3.21  | 0.8   | 0.37  |  | 109.4 | 14.05 | 0.64  | 0.33  |
| CLIC4  |  | 99.2  | 3.46  | -0.2  | -0.1  |  | 116.6 | 9.95  | 1.54  | 0.74  |
| CLIC5  |  | 99.1  | 4.12  | -0.2  | -0.1  |  | 113.8 | 9.52  | 1.33  | 0.63  |
| CLIC6  |  | 102.6 | 2.48  | 0.66  | 0.23  |  | 95.4  | 1.5   | -0.56 | -0.16 |
| CNGA1  |  | 96.2  | 1     | -2.86 | -1.05 |  | 103.2 | 22.13 | 0.14  | 0.06  |
| CNGA2  |  | 95.1  | 6.21  | -0.77 | -0.41 |  | 78.7  | 16.4  | -1.26 | -0.67 |
| CNGA3  |  | 103.9 | 4.08  | 0.87  | 0.42  |  | 128.1 | 11.57 | 2.25  | 1.09  |
| CNGA4  |  | 105.1 | 5.79  | 0.86  | 0.42  |  | 87.9  | 2.72  | -1.85 | -0.57 |
| CNGB1  |  | 102.7 | 6.02  | 0.45  | 0.22  |  | 93.8  | 11.2  | -0.49 | -0.2  |
| CNGB3  |  | 112.8 | 5.78  | 2.1   | 1.07  |  | 104   | 4.33  | 0.69  | 0.26  |
| FXYP1  |  | 111.4 | 3.68  | 2.76  | 1.25  |  | 120.6 | 6.07  | 2.87  | 1.22  |
| FXYP3  |  | 116.7 | 0.28  | 8.81  | 2.57  |  | 130.5 | 15.69 | 1.89  | 1.18  |
| FXYP3  |  | 108   | 5.03  | 1.52  | 0.52  |  | 114.1 | 7.02  | 1.69  | 0.53  |
| FXYP4  |  | 106.3 | 5.96  | 1.03  | 0.5   |  | 88.9  | 6.3   | -1.29 | -0.46 |
| FXYP6  |  | 104.1 | 6.52  | 0.6   | 0.32  |  | 110.4 | 3.9   | 1.71  | 0.59  |
| FXYP7  |  | 116.2 | 3.1   | 4.46  | 1.92  |  | 91.9  | 14.9  | -0.53 | -0.28 |
| GABRA1 |  | 93.8  | 11.31 | -0.54 | -0.27 |  | 94.7  | 21.83 | -0.23 | -0.11 |
| GABRA2 |  | 105.2 | 5.03  | 0.98  | 0.48  |  | 117.1 | 18.43 | 0.91  | 0.49  |
| GABRA3 |  | 112.5 | 4.16  | 2.8   | 1.38  |  | 133.4 | 6.05  | 4.56  | 1.88  |
| GABRA4 |  | 105.2 | 3.93  | 1.18  | 0.49  |  | 118.4 | 10.8  | 1.45  | 0.59  |
| GABRA5 |  | 94.4  | 3.18  | -1.69 | -0.79 |  | 85.1  | 4.64  | -1.79 | -0.58 |
| GABRA6 |  | 103.7 | 5.2   | 0.66  | 0.29  |  | 123.6 | 6.07  | 2.63  | 0.91  |
| GABRB1 |  | 105.9 | 3.96  | 1.32  | 0.55  |  | 106.4 | 14.04 | 0.41  | 0.18  |
| GABRB2 |  | 102.9 | 5.79  | 0.48  | 0.26  |  | 124.9 | 6.51  | 3.22  | 1.36  |
| GABRB3 |  | 102.8 | 1.93  | 0.98  | 0.34  |  | 110   | 10.82 | 0.79  | 0.32  |
| GABRD  |  | 99.9  | 3.35  | -0.02 | -0.01 |  | 111.5 | 12.42 | 0.82  | 0.34  |
| GABRE  |  | 100.4 | 4.65  | 0.09  | 0.04  |  | 86.7  | 4.17  | -1.83 | -0.6  |
| GABRG1 |  | 106.8 | 1.78  | 2.87  | 1.09  |  | 132.4 | 14.36 | 2.17  | 1.13  |
| GABRG2 |  | 105   | 5.05  | 0.98  | 0.47  |  | 96.5  | 5.25  | -0.44 | -0.15 |
| GABRG3 |  | 95.8  | 2.68  | -1.49 | -0.69 |  | 96.1  | 6.5   | -0.42 | -0.15 |
| GABRP  |  | 93.1  | 0.3   | -4.36 | -1.27 |  | 81.4  | 16.9  | -1.07 | -0.57 |
| GABRQ  |  | 101.1 | 6.98  | 0.15  | 0.08  |  | 92.8  | 7.05  | -0.78 | -0.29 |
| GABRR1 |  | 95    | 6.47  | -0.76 | -0.4  |  | 90.9  | 9.24  | -0.9  | -0.42 |
| GABRR2 |  | 104.2 | 6.23  | 0.65  | 0.34  |  | 104.8 | 8.81  | 0.48  | 0.22  |

|        |  |       |       |       |       |  |       |       |       |       |
|--------|--|-------|-------|-------|-------|--|-------|-------|-------|-------|
| GABRR3 |  | 101.8 | 3.09  | 0.56  | 0.25  |  | 113   | 7.77  | 1.42  | 0.57  |
| GLRA1  |  | 107.2 | 2.33  | 2.58  | 1.08  |  | 110.8 | 1.37  | 2.56  | 0.77  |
| GLRA2  |  | 107.9 | 5.07  | 1.52  | 0.72  |  | 125.9 | 6.1   | 3.31  | 1.24  |
| GLRA3  |  | 105.7 | 5.64  | 0.99  | 0.48  |  | 100.5 | 7.8   | 0.05  | 0.02  |
| GLRB   |  | 99.1  | 3     | -0.26 | -0.12 |  | 105.1 | 8.42  | 0.53  | 0.21  |
| GRIA1  |  | 96.4  | 2.31  | -1.43 | -0.62 |  | 93.3  | 9.12  | -0.61 | -0.24 |
| GRIA2  |  | 114.2 | 2.66  | 4.37  | 1.78  |  | 133.1 | 17.92 | 1.8   | 0.98  |
| GRIA3  |  | 96.2  | 5.16  | -0.71 | -0.37 |  | 103.2 | 2.29  | 0.69  | 0.22  |
| GRIA4  |  | 93.9  | 17.32 | -0.35 | -0.2  |  | 93.8  | 27.59 | -0.22 | -0.12 |
| GRID1  |  | 116   | 0.41  | 8.31  | 2.44  |  | 105   | 5.98  | 0.71  | 0.3   |
| GRID2  |  | 106   | 2.82  | 1.71  | 0.66  |  | 114.6 | 14.32 | 0.93  | 0.4   |
| GRIK1  |  | 102.6 | 2.34  | 0.84  | 0.31  |  | 112.5 | 9.94  | 1.04  | 0.41  |
| GRIK2  |  | 109.3 | 4.78  | 1.8   | 0.79  |  | 117   | 1.56  | 2.5   | 0.73  |
| GRIK3  |  | 113.4 | 4.74  | 2.63  | 1.28  |  | 136.3 | 14.68 | 2.39  | 1.27  |
| GRIK4  |  | 104.4 | 9.88  | 0.44  | 0.24  |  | 99.8  | 4.98  | -0.02 | -0.01 |
| GRIK5  |  | 113   | 1.95  | 5.19  | 2.03  |  | 137.9 | 16.38 | 2.24  | 1.19  |
| GRIN1  |  | 107.8 | 3.9   | 1.84  | 0.89  |  | 106.8 | 19.94 | 0.33  | 0.18  |
| GRIN2A |  | 108.4 | 2.86  | 2.59  | 1.25  |  | 127.4 | 3.77  | 4.88  | 1.78  |
| GRIN2B |  | 97.4  | 5.3   | -0.46 | -0.21 |  | 93.4  | 9.93  | -0.55 | -0.22 |
| GRIN2C |  | 107.2 | 4.48  | 1.46  | 0.63  |  | 122.1 | 6.03  | 2.47  | 0.85  |
| GRIN2D |  | 103.5 | 11.07 | 0.31  | 0.17  |  | 122.9 | 15.1  | 1.45  | 0.75  |
| GRIN3A |  | 120.6 | 25.25 | 0.82  | 0.47  |  | 108.1 | 8.34  | 0.84  | 0.37  |
| GRIN3B |  | 102.1 | 8.81  | 0.23  | 0.13  |  | 112.3 | 9.04  | 1.21  | 0.55  |
| HCN1   |  | 102   | 3.72  | 0.49  | 0.23  |  | 103.9 | 22.59 | 0.17  | 0.09  |
| HCN2   |  | 102   | 13.62 | 0.14  | 0.08  |  | 104   | 15.78 | 0.23  | 0.1   |
| HCN3   |  | 94.9  | 4.16  | -1.15 | -0.51 |  | 109.8 | 18.14 | 0.54  | 0.26  |
| HCN4   |  | 106.5 | 9.5   | 0.68  | 0.37  |  | 109.6 | 7.81  | 1.06  | 0.46  |
| HTR3A  |  | 92.4  | 4.55  | -1.57 | -0.71 |  | 105.9 | 10.78 | 0.53  | 0.25  |
| HTR3B  |  | 96.8  | 3.19  | -0.89 | -0.38 |  | 112.6 | 9.77  | 1.24  | 0.58  |
| HTR3C  |  | 93.7  | 2.36  | -2.2  | -0.86 |  | 93.1  | 8.93  | -0.74 | -0.34 |
| HTR3D  |  | 109.1 | 4.83  | 1.83  | 0.86  |  | 125.1 | 14.15 | 1.67  | 0.76  |
| HTR3E  |  | 91.2  | 6.58  | -1.29 | -0.61 |  | 93.1  | 6.25  | -1.01 | -0.44 |
| ITPR1  |  | 105.1 | 1.1   | 2.64  | 0.88  |  | 103.4 | 8.8   | 0.35  | 0.16  |
| ITPR2  |  | 104.7 | 3.34  | 1.28  | 0.6   |  | 118.4 | 13.6  | 1.3   | 0.67  |
| ITPR3  |  | 112.5 | 2.43  | 4.08  | 1.62  |  | 128.2 | 7.33  | 3.41  | 1.54  |
| KCNA1  |  | 113.4 | 4.1   | 2.97  | 1.39  |  | 99.8  | 22.44 | -0.01 | -0.01 |
| KCNA10 |  | 75.4  | 17.81 | -1.37 | -0.67 |  | 77.2  | 18.24 | -1.17 | -0.53 |
| KCNA2  |  | 104.3 | 3.13  | 1.08  | 0.4   |  | 103.5 | 9.89  | 0.29  | 0.11  |
| KCNA4  |  | 93.3  | 10.13 | -0.64 | -0.3  |  | 86.1  | 14.23 | -0.88 | -0.38 |
| KCNA5  |  | 107.4 | 11.05 | 0.65  | 0.34  |  | 113.9 | 15.93 | 0.78  | 0.35  |
| KCNA6  |  | 106.1 | 6.79  | 0.87  | 0.46  |  | 122.1 | 2.91  | 4.01  | 1.3   |

|        |  |       |       |       |       |  |       |       |       |       |
|--------|--|-------|-------|-------|-------|--|-------|-------|-------|-------|
| KCNA7  |  | 120   | 19.3  | 1.03  | 0.57  |  | 115.7 | 26.13 | 0.57  | 0.29  |
| KCNAB1 |  | 111.3 | 5.88  | 1.82  | 0.93  |  | 134.5 | 20.65 | 1.64  | 0.9   |
| KCNAB2 |  | 112   | 6.1   | 1.87  | 0.96  |  | 123.8 | 15.8  | 1.47  | 0.78  |
| KCNAB3 |  | 99.7  | 6.5   | -0.04 | -0.02 |  | 100   | 9.06  | 0     | 0     |
| KCNB1  |  | 111   | 7.48  | 1.42  | 0.76  |  | 109.3 | 8.55  | 0.99  | 0.47  |
| KCNB2  |  | 111.9 | 3.36  | 3.2   | 1.49  |  | 123.3 | 3.46  | 4.31  | 1.49  |
| KCNC1  |  | 108.8 | 4.53  | 1.84  | 0.92  |  | 112   | 13.98 | 0.83  | 0.43  |
| KCNC2  |  | 93.1  | 6.73  | -1    | -0.53 |  | 120.5 | 4.57  | 3.13  | 1.14  |
| KCNC4  |  | 100.6 | 3.29  | 0.16  | 0.07  |  | 100   | 9.59  | 0     | 0     |
| KCND1  |  | 110.2 | 2.13  | 3.85  | 1.55  |  | 141.6 | 8.48  | 4.4   | 2.02  |
| KCND2  |  | 103.2 | 2.74  | 1.02  | 0.44  |  | 125.3 | 15.47 | 1.58  | 0.83  |
| KCND3  |  | 90.8  | 10.7  | -0.84 | -0.4  |  | 101.8 | 14.31 | 0.11  | 0.05  |
| KCNE1  |  | 125.4 | 36.08 | 0.7   | 0.41  |  | 128.3 | 29.88 | 0.94  | 0.52  |
| KCNE1L |  | 126.9 | 26.39 | 1.02  | 0.58  |  | 132.6 | 17.22 | 1.83  | 0.96  |
| KCNE2  |  | 95.6  | 1.87  | -1.81 | -0.67 |  | 94.7  | 5.71  | -0.76 | -0.29 |
| KCNE3  |  | 103   | 3.69  | 0.78  | 0.37  |  | 84.3  | 9.28  | -1.36 | -0.52 |
| KCNF1  |  | 91.8  | 2.11  | -3.09 | -1.17 |  | 105.9 | 11.45 | 0.5   | 0.24  |
| KCNG1  |  | 97.9  | 2.76  | -0.65 | -0.27 |  | 102.6 | 6.91  | 0.35  | 0.15  |
| KCNG2  |  | 111.3 | 8.17  | 1.36  | 0.74  |  | 130.7 | 7.26  | 3.55  | 1.49  |
| KCNG3  |  | 95.4  | 4.12  | -1.03 | -0.46 |  | 94    | 9.68  | -0.59 | -0.28 |
| KCNG4  |  | 105   | 2.38  | 1.75  | 0.73  |  | 119.6 | 6.35  | 2.58  | 1.08  |
| KCNH1  |  | 95    | 3.23  | -1.51 | -0.71 |  | 86.6  | 16.1  | -0.76 | -0.33 |
| KCNH2  |  | 105.4 | 13.91 | 0.38  | 0.2   |  | 101.2 | 5.46  | 0.12  | 0.04  |
| KCNH3  |  | 121.4 | 4.21  | 4.64  | 2.19  |  | 111.1 | 5.17  | 1.73  | 0.7   |
| KCNH4  |  | 96.8  | 4.37  | -0.69 | -0.31 |  | 85    | 11.32 | -1.29 | -0.61 |
| KCNH5  |  | 97.6  | 1.67  | -1.28 | -0.54 |  | 114.5 | 19.7  | 0.7   | 0.32  |
| KCNH6  |  | 122.8 | 8.51  | 2.62  | 1.42  |  | 151.8 | 30.12 | 1.71  | 0.96  |
| KCNH7  |  | 101   | 2.85  | 0.32  | 0.14  |  | 117.9 | 11.22 | 1.46  | 0.64  |
| KCNH8  |  | 95.4  | 2.99  | -1.43 | -0.63 |  | 111.7 | 14.1  | 0.78  | 0.36  |
| KCNJ1  |  | 86.3  | 10.8  | -1.27 | -0.63 |  | 87    | 14.88 | -0.79 | -0.34 |
| KCNJ10 |  | 108.5 | 2.37  | 2.82  | 1.11  |  | 111.2 | 5.12  | 1.75  | 0.7   |
| KCNJ11 |  | 108.9 | 5.36  | 1.56  | 0.78  |  | 79.5  | 38.71 | -0.53 | -0.3  |
| KCNJ13 |  | 94.6  | 3.96  | -1.26 | -0.56 |  | 76.7  | 7.88  | -2.79 | -1.26 |
| KCNJ14 |  | 118.1 | 0.89  | 8.71  | 2.71  |  | 137.2 | 25.39 | 1.45  | 0.81  |
| KCNJ15 |  | 103.9 | 6.89  | 0.56  | 0.27  |  | 115.6 | 6.54  | 1.72  | 0.61  |
| KCNJ16 |  | 92.2  | 9.31  | -0.81 | -0.38 |  | 79.3  | 12.56 | -1.44 | -0.6  |
| KCNJ2  |  | 102.6 | 3.48  | 0.69  | 0.3   |  | 95.8  | 3.77  | -0.57 | -0.18 |
| KCNJ3  |  | 102.5 | 3.83  | 0.62  | 0.28  |  | 87.4  | 7.06  | -1.34 | -0.49 |
| KCNJ4  |  | 103.6 | 4.9   | 0.7   | 0.32  |  | 97.9  | 18.32 | -0.11 | -0.05 |
| KCNJ5  |  | 103.4 | 5.11  | 0.65  | 0.3   |  | 92.7  | 11.64 | -0.56 | -0.23 |
| KCNJ6  |  | 96.9  | 3.62  | -0.71 | -0.28 |  | 103.1 | 13.48 | 0.21  | 0.09  |

|        |  |       |       |       |       |  |       |       |       |       |
|--------|--|-------|-------|-------|-------|--|-------|-------|-------|-------|
| KCNJ8  |  | 113.1 | 3.58  | 3.44  | 1.55  |  | 134.5 | 18.06 | 1.84  | 0.86  |
| KCNJ9  |  | 100.3 | 10.02 | 0.03  | 0.01  |  | 101.6 | 20.78 | 0.08  | 0.04  |
| KCNK1  |  | 102.2 | 8.78  | 0.25  | 0.12  |  | 114   | 14.25 | 0.93  | 0.42  |
| KCNK10 |  | 108.3 | 9.48  | 0.87  | 0.43  |  | 117.9 | 30    | 0.59  | 0.29  |
| KCNK12 |  | 105.8 | 6.48  | 0.87  | 0.46  |  | 117.2 | 5.79  | 2.31  | 0.9   |
| KCNK13 |  | 104.8 | 10.63 | 0.43  | 0.23  |  | 94.9  | 13.88 | -0.32 | -0.14 |
| KCNK15 |  | 102.6 | 6.46  | 0.39  | 0.19  |  | 109.8 | 5.15  | 1.37  | 0.49  |
| KCNK16 |  | 100.4 | 8.2   | 0.04  | 0.02  |  | 93.4  | 13.78 | -0.43 | -0.19 |
| KCNK17 |  | 78.4  | 17.72 | -1.21 | -0.59 |  | 77.5  | 26.02 | -0.84 | -0.39 |
| KCNK18 |  | 99.3  | 6.17  | -0.11 | -0.05 |  | 110.8 | 9.07  | 0.95  | 0.36  |
| KCNK2  |  | 95.3  | 2.96  | -1.53 | -0.71 |  | 96.7  | 9.03  | -0.29 | -0.11 |
| KCNK4  |  | 121.9 | 18.69 | 1.17  | 0.58  |  | 113   | 21.36 | 0.58  | 0.27  |
| KCNK5  |  | 90.5  | 8.2   | -1.1  | -0.51 |  | 88.4  | 13.54 | -0.77 | -0.32 |
| KCNK6  |  | 131.2 | 28.92 | 1.08  | 0.62  |  | 137.7 | 14.28 | 2.51  | 1.28  |
| KCNK7  |  | 104.1 | 4.58  | 0.84  | 0.42  |  | 103.3 | 17.46 | 0.19  | 0.1   |
| KCNK9  |  | 96.8  | 2.35  | -1.15 | -0.46 |  | 98    | 5.95  | -0.23 | -0.08 |
| KCNMA1 |  | 97.4  | 3.88  | -0.62 | -0.27 |  | 91.3  | 10.6  | -0.8  | -0.38 |
| KCNMB1 |  | 96.6  | 2.35  | -1.2  | -0.47 |  | 101.4 | 7.78  | 0.17  | 0.08  |
| KCNMB2 |  | 84.5  | 12.95 | -1.17 | -0.56 |  | 46.2  | 23.33 | -2.29 | -1.12 |
| KCNMB3 |  | 88.2  | 5.44  | -2.09 | -0.97 |  | 88.2  | 6.79  | -1.61 | -0.71 |
| KCNMB4 |  | 101.5 | 5.47  | 0.27  | 0.13  |  | 108.9 | 9.66  | 0.77  | 0.3   |
| KCNN1  |  | 102.5 | 3.29  | 0.71  | 0.32  |  | 117.7 | 10.11 | 1.58  | 0.67  |
| KCNN2  |  | 96.7  | 6.25  | -0.48 | -0.21 |  | 95.1  | 5.06  | -0.83 | -0.33 |
| KCNN3  |  | 94.5  | 3.26  | -1.53 | -0.65 |  | 98.6  | 12.23 | -0.11 | -0.05 |
| KCNN4  |  | 103.5 | 9.67  | 0.36  | 0.17  |  | 118.2 | 29.36 | 0.62  | 0.35  |
| KCNQ1  |  | 102.5 | 3.39  | 0.69  | 0.3   |  | 98.5  | 5.1   | -0.18 | -0.06 |
| KCNQ2  |  | 98.1  | 2.7   | -0.51 | -0.18 |  | 95.5  | 8.21  | -0.51 | -0.23 |
| KCNQ3  |  | 93.5  | 5.79  | -1.03 | -0.45 |  | 97.9  | 12.17 | -0.15 | -0.06 |
| KCNQ4  |  | 95.6  | 23.96 | -0.18 | -0.11 |  | 102.1 | 35.16 | 0.06  | 0.03  |
| KCNQ5  |  | 101.3 | 7.16  | 0.18  | 0.09  |  | 101.7 | 3.33  | 0.29  | 0.1   |
| KCNT1  |  | 112.8 | 6.17  | 2.04  | 0.98  |  | 111.4 | 11.44 | 0.91  | 0.4   |
| KCNT2  |  | 96.3  | 4.99  | -0.72 | -0.34 |  | 106.7 | 6.45  | 0.82  | 0.31  |
| KCNV1  |  | 114.5 | 8.98  | 1.6   | 0.79  |  | 131.8 | 16.75 | 1.82  | 0.84  |
| KCNV2  |  | 99    | 4.04  | -0.2  | -0.08 |  | 88    | 8.17  | -1.13 | -0.42 |
| KCTD17 |  | 107.4 | 5.72  | 1.26  | 0.68  |  | 146.2 | 29.97 | 1.52  | 0.85  |
| KCTD2  |  | 72.7  | 18.29 | -1.49 | -0.85 |  | 82.8  | 9.45  | -1.63 | -0.75 |
| KCTD3  |  | 100.9 | 6.55  | 0.14  | 0.07  |  | 114.6 | 21.49 | 0.66  | 0.32  |
| KCTD5  |  | 124.8 | 19.46 | 1.27  | 0.88  |  | 174.5 | 3.35  | 12.94 | 4.41  |
| LENG9  |  | 104.1 | 3.27  | 1.1   | 0.45  |  | 107.3 | 7.29  | 0.57  | 0.18  |
| MCOLN1 |  | 106.4 | 6.43  | 0.97  | 0.47  |  | 131.8 | 30.55 | 1.03  | 0.5   |
| MCOLN2 |  | 94.3  | 7.93  | -0.68 | -0.31 |  | 91.6  | 16.43 | -0.5  | -0.24 |

|         |  |       |       |       |       |  |       |       |       |       |
|---------|--|-------|-------|-------|-------|--|-------|-------|-------|-------|
| MCOLN3  |  | 105.2 | 5.64  | 0.9   | 0.43  |  | 129.6 | 21.89 | 1.32  | 0.63  |
| NALCN   |  | 97.6  | 9.74  | -0.23 | -0.11 |  | 85.4  | 12.29 | -1.15 | -0.55 |
| NUPL2   |  | 98.6  | 4.27  | -0.28 | -0.11 |  | 108.4 | 9.31  | 0.72  | 0.28  |
| P2RX1   |  | 87.5  | 7.72  | -1.54 | -0.71 |  | 89.4  | 14.17 | -0.68 | -0.29 |
| P2RX2   |  | 102.1 | 8.46  | 0.25  | 0.12  |  | 80.9  | 12.43 | -1.37 | -0.58 |
| P2RX3   |  | 95    | 4.45  | -0.96 | -0.39 |  | 88.4  | 10.23 | -1.09 | -0.51 |
| P2RX4   |  | 87.3  | 9.02  | -1.34 | -0.62 |  | 95.9  | 9.91  | -0.4  | -0.18 |
| P2RX6   |  | 95.8  | 7.49  | -0.53 | -0.24 |  | 87.4  | 7.31  | -1.59 | -0.7  |
| P2RX7   |  | 105.9 | 8.5   | 0.66  | 0.31  |  | 91.9  | 10.32 | -0.66 | -0.26 |
| PKD2    |  | 111.9 | 4.02  | 2.71  | 1.17  |  | 117.1 | 6.66  | 1.38  | 0.44  |
| PKD2L1  |  | 103.9 | 3.98  | 0.93  | 0.42  |  | 98.6  | 6.32  | -0.16 | -0.06 |
| PKD2L2  |  | 98.1  | 2.13  | -0.78 | -0.34 |  | 109.5 | 2.09  | 1.78  | 0.54  |
| PKDREJ  |  | 112.9 | 2.12  | 4.64  | 1.71  |  | 110.1 | 9.64  | 0.7   | 0.24  |
| RYR1    |  | 106.2 | 7.48  | 0.81  | 0.39  |  | 111.8 | 12.22 | 0.86  | 0.36  |
| RYR2    |  | 101   | 2.51  | 0.32  | 0.13  |  | 98.8  | 11.21 | -0.1  | -0.05 |
| RYR3    |  | 105.8 | 5.25  | 1.07  | 0.5   |  | 106.9 | 4.84  | 0.87  | 0.29  |
| SCN10A  |  | 104.9 | 2.83  | 1.6   | 0.7   |  | 124.6 | 11.62 | 1.95  | 0.85  |
| SCN11A  |  | 93.7  | 3.58  | -1.61 | -0.7  |  | 102.2 | 5.79  | 0.34  | 0.14  |
| SCN1A   |  | 100.5 | 6.9   | 0.07  | 0.03  |  | 98.1  | 7.88  | -0.22 | -0.1  |
| SCN1B   |  | 99.9  | 4.43  | -0.02 | -0.01 |  | 127   | 15.13 | 1.7   | 0.78  |
| SCN2A   |  | 113.2 | 7.82  | 1.59  | 0.8   |  | 103.8 | 2.79  | 0.93  | 0.33  |
| SCN2B   |  | 99.5  | 4.41  | -0.11 | -0.05 |  | 95.4  | 11.77 | -0.35 | -0.14 |
| SCN3A   |  | 102.4 | 4.26  | 0.54  | 0.25  |  | 119.7 | 14.39 | 1.3   | 0.59  |
| SCN3B   |  | 112.9 | 4.38  | 2.82  | 1.31  |  | 127.9 | 12.79 | 2.03  | 0.9   |
| SCN4A   |  | 97    | 4.66  | -0.61 | -0.28 |  | 115.5 | 9.51  | 1.57  | 0.73  |
| SCN4B   |  | 117.2 | 6.97  | 2.42  | 1.17  |  | 138   | 16.32 | 2.23  | 1.03  |
| SCN5A   |  | 85.9  | 6.1   | -2.23 | -1.05 |  | 95.1  | 13.27 | -0.36 | -0.17 |
| SCN7A   |  | 89.8  | 11.93 | -0.83 | -0.4  |  | 65.2  | 20.76 | -1.66 | -0.81 |
| SCN8A   |  | 91.3  | 1.78  | -2.66 | -0.86 |  | 94.5  | 1.61  | -1.59 | -0.5  |
| SCN9A   |  | 114.2 | 3.92  | 3.29  | 1.41  |  | 121.7 | 4.84  | 1.87  | 0.58  |
| SCNN1A  |  | 91.7  | 7.42  | -1.04 | -0.47 |  | 79.7  | 8.52  | -2.24 | -1.01 |
| SCNN1B  |  | 111.6 | 10.89 | 1.06  | 0.52  |  | 136.6 | 27.97 | 1.29  | 0.63  |
| SCNN1D  |  | 105.5 | 7.9   | 0.68  | 0.33  |  | 137.5 | 29.76 | 1.24  | 0.61  |
| SCNN1G  |  | 96.2  | 0.63  | -2.18 | -0.66 |  | 108.9 | 23.43 | 0.38  | 0.21  |
| SHKBP1  |  | 98.7  | 2.63  | -0.46 | -0.2  |  | 103.6 | 6.56  | 0.44  | 0.17  |
| SHROOM1 |  | 93.3  | 7.15  | -0.88 | -0.4  |  | 78.2  | 9.08  | -1.92 | -0.73 |
| SHROOM2 |  | 110.9 | 7.04  | 1.52  | 0.73  |  | 156.7 | 50.85 | 1.11  | 0.55  |
| SHROOM4 |  | 122.6 | 5.49  | 3.9   | 1.98  |  | 120.3 | 9     | 1.47  | 0.51  |
| SLC9C1  |  | 92.8  | 3.19  | -2.12 | -0.94 |  | 106.1 | 10.49 | 0.52  | 0.22  |
| TAS1R1  |  | 102.4 | 7.3   | 0.32  | 0.14  |  | 97.7  | 7.58  | -0.22 | -0.08 |
| TAS1R3  |  | 98.4  | 7.3   | -0.2  | -0.09 |  | 93.8  | 5.1   | -0.73 | -0.24 |

|         |  |       |       |       |       |  |       |       |       |       |
|---------|--|-------|-------|-------|-------|--|-------|-------|-------|-------|
| TMC1    |  | 107.7 | 9.15  | 0.8   | 0.4   |  | 98    | 4.28  | -0.21 | -0.07 |
| TMC2    |  | 111.6 | 4.24  | 2.52  | 1.1   |  | 114.2 | 9.38  | 1.01  | 0.35  |
| TMC3    |  | 92.3  | 6.86  | -1.06 | -0.47 |  | 87.6  | 8.6   | -1.13 | -0.42 |
| TMC4    |  | 104.6 | 11.03 | 0.41  | 0.19  |  | 114.3 | 12.64 | 0.99  | 0.41  |
| TMC5    |  | 99.6  | 7.86  | -0.04 | -0.02 |  | 89    | 3.38  | -2.43 | -0.88 |
| TMC6    |  | 108.7 | 5.67  | 1.48  | 0.7   |  | 111.1 | 9.14  | 1     | 0.39  |
| TMC7    |  | 84.3  | 18.23 | -0.86 | -0.43 |  | 91    | 28.2  | -0.31 | -0.15 |
| TMC8    |  | 104.8 | 2.49  | 1.57  | 0.6   |  | 111.8 | 8.05  | 0.89  | 0.3   |
| TMEM235 |  | 90.3  | 4.23  | -1.94 | -0.81 |  | 77.4  | 12.58 | -1.75 | -0.94 |
| TPCN1   |  | 90.8  | 5.4   | -1.64 | -0.76 |  | 68.7  | 31.83 | -0.98 | -0.48 |
| TPCN2   |  | 98.5  | 4.67  | -0.3  | -0.13 |  | 110.5 | 11.23 | 0.88  | 0.4   |
| TRPA1   |  | 99.1  | 6.22  | -0.13 | -0.06 |  | 126.5 | 12.21 | 2.06  | 0.94  |
| TRPC1   |  | 90.3  | 4.46  | -2.06 | -0.94 |  | 96.4  | 15.75 | -0.22 | -0.11 |
| TRPC3   |  | 94.3  | 4.85  | -1.12 | -0.52 |  | 99.6  | 23.04 | -0.02 | -0.01 |
| TRPC4   |  | 96    | 5.17  | -0.68 | -0.28 |  | 99.6  | 4.43  | -0.07 | -0.03 |
| TRPC5   |  | 98.5  | 1.77  | -0.79 | -0.34 |  | 101.3 | 8.1   | 0.13  | 0.05  |
| TRPC6   |  | 99.6  | 2.21  | -0.17 | -0.08 |  | 93.3  | 6.23  | -0.73 | -0.25 |
| TRPC7   |  | 95.9  | 1.28  | -1.34 | -0.41 |  | 85.8  | 4.29  | -2.69 | -1.04 |
| TRPM1   |  | 106.5 | 11.44 | 0.55  | 0.29  |  | 103.7 | 10.21 | 0.28  | 0.11  |
| TRPM2   |  | 94    | 6.48  | -0.85 | -0.37 |  | 87.2  | 4.38  | -2.41 | -0.94 |
| TRPM3   |  | 93.6  | 6.16  | -0.94 | -0.41 |  | 90.4  | 9.1   | -1    | -0.46 |
| TRPM4   |  | 118   | 17.87 | 1.01  | 0.5   |  | 128.1 | 14.86 | 1.74  | 0.76  |
| TRPM5   |  | 99.5  | 4.58  | -0.1  | -0.05 |  | 110   | 22.04 | 0.43  | 0.2   |
| TRPM6   |  | 96.1  | 7.05  | -0.51 | -0.23 |  | 92.2  | 9.84  | -0.76 | -0.35 |
| TRPM7   |  | 107.8 | 11.42 | 0.66  | 0.35  |  | 105.8 | 15.31 | 0.33  | 0.15  |
| TRPM8   |  | 102.4 | 2.73  | 0.81  | 0.35  |  | 124   | 7.64  | 2.64  | 1.05  |
| TRPV1   |  | 105.9 | 3.07  | 1.8   | 0.8   |  | 118.7 | 11.63 | 1.48  | 0.65  |
| TRPV2   |  | 121.5 | 14.35 | 1.49  | 0.74  |  | 114.9 | 15.79 | 0.88  | 0.39  |
| TRPV3   |  | 97.3  | 4.15  | -0.65 | -0.31 |  | 96.8  | 4.24  | -0.4  | -0.13 |
| TRPV4   |  | 114.6 | 13.19 | 1.1   | 0.54  |  | 102.7 | 11.13 | 0.21  | 0.09  |
| TRPV5   |  | 103.3 | 3.68  | 0.85  | 0.39  |  | 121.9 | 7.7   | 2.39  | 0.95  |
| TRPV6   |  | 96.4  | 3.77  | -0.92 | -0.44 |  | 96.5  | 8.59  | -0.32 | -0.12 |
| TTYH1   |  | 97.7  | 6.63  | -0.33 | -0.16 |  | 98.2  | 4.9   | -0.29 | -0.11 |
| TTYH2   |  | 118.5 | 7.68  | 2.38  | 1.16  |  | 153.1 | 39.68 | 1.33  | 0.65  |
| TTYH3   |  | 65.1  | 15.07 | -2.3  | -1.14 |  | 76.6  | 19.43 | -1.18 | -0.57 |
| VDAC1   |  | 105.8 | 12.68 | 0.44  | 0.24  |  | 87.9  | 32.5  | -0.36 | -0.19 |
| VDAC2   |  | 109.7 | 8.74  | 1.05  | 0.53  |  | 99.7  | 4.3   | -0.03 | -0.01 |
| VDAC3   |  | 111.5 | 2.63  | 3.58  | 1.4   |  | 117.5 | 8.99  | 1.27  | 0.43  |
